# Supplementary material for: Induction of Liver Size Reduction in Zebrafish Larvae by the Emerging Synthetic Cannabinoid 4F-MDMB-BINACA and Its Impact on Drug Metabolism
Source: MDPI journal article supplement (doi:10.3390/molecules27041290), 2022-02-15
Supplement: s1 [file s1]

Supplementary Material

# Induction of liver size reduction in zebrafish larvae by the emerging synthetic cannabinoid 4F-MDMB-BINACA and its impact on drug metabolism

Yu Mi Park <sup>1,2,3</sup>, Charlotte Dahlem <sup>4</sup>, Markus R. Meyer <sup>5</sup>, Alexandra K. Kiemer <sup>4</sup>, Rolf Müller <sup>1,3,6,\*</sup> and Jennifer Herrmann <sup>1,6,\*</sup>

<sup>1</sup> Helmholtz Institute for Pharmaceutical Research Saarland (HIPS), Helmholtz Centre for Infection Research, Saarland University Campus, 66123 Saarbrücken, Germany; Yu-Mi.Park@helmholtz-hips.de

<sup>2</sup> Environmental Safety Group, Korea Institute of Science and Technology (KIST) Europe, 66123 Saarbrücken, Germany

<sup>3</sup> Department of Pharmacy, Saarland University, 66123 Saarbrücken, Germany

<sup>4</sup> Department of Pharmacy, Pharmaceutical Biology, Saarland University, Campus C2 3, 66123 Saarbrücken, Germany; charlotte.dahlem@uni-saarland.de; pharm.bio.kiemer@mx.uni-saarland.de

<sup>5</sup> Department of Experimental and Clinical Toxicology, Institute of Experimental and Clinical Pharmacology and Toxicology, Center for Molecular Signaling (PZMS), Saarland University, 66421 Homburg, Germany; m.r.meyer@mx.uni-saarland.de

<sup>6</sup> German Center for Infection Research (DZIF), 38124 Braunschweig, Germany

\* Correspondence: Rolf.Mueller@helmholtz-hips.de (R.M.); Jennifer.Herrmann@helmholtz-hips.de (J.H.)

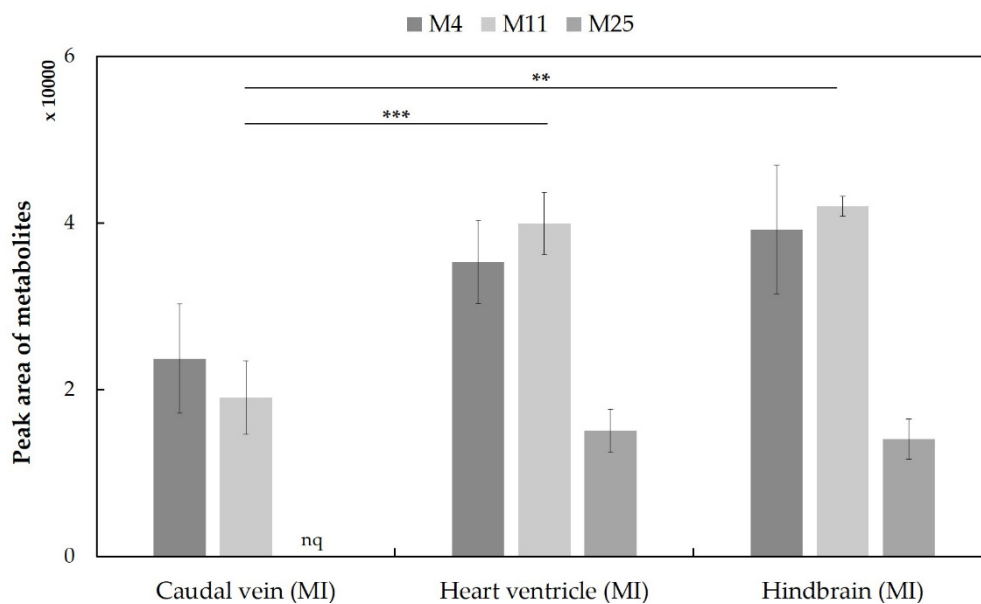

**Figure S1.** Detection profiles of the three minor abundant metabolites of 4F-MDMB-BINACA in microinjected zebrafish larvae (caudal vein, heart ventricle, and hindbrain). These three minor metabolites, M4, M11, and M25, were formed by *N*-dealkylation, oxidative defluorination, hydroxylation of the tertiary butyl part in combination with glucuronidation isomer 1, respectively. The clustered columns are displayed as mean  $\pm$  SD using the peak areas detected from 30 pooled larvae ( $n=3$ ). The *p*-values for M11 in the different groups were calculated by one-way ANOVA (\*\*  $p<0.01$ , \*\*\*  $p<0.001$ ). nq: Confirmed mass, but not quantified due to peak detection below signal-to-noise ratio of 3.

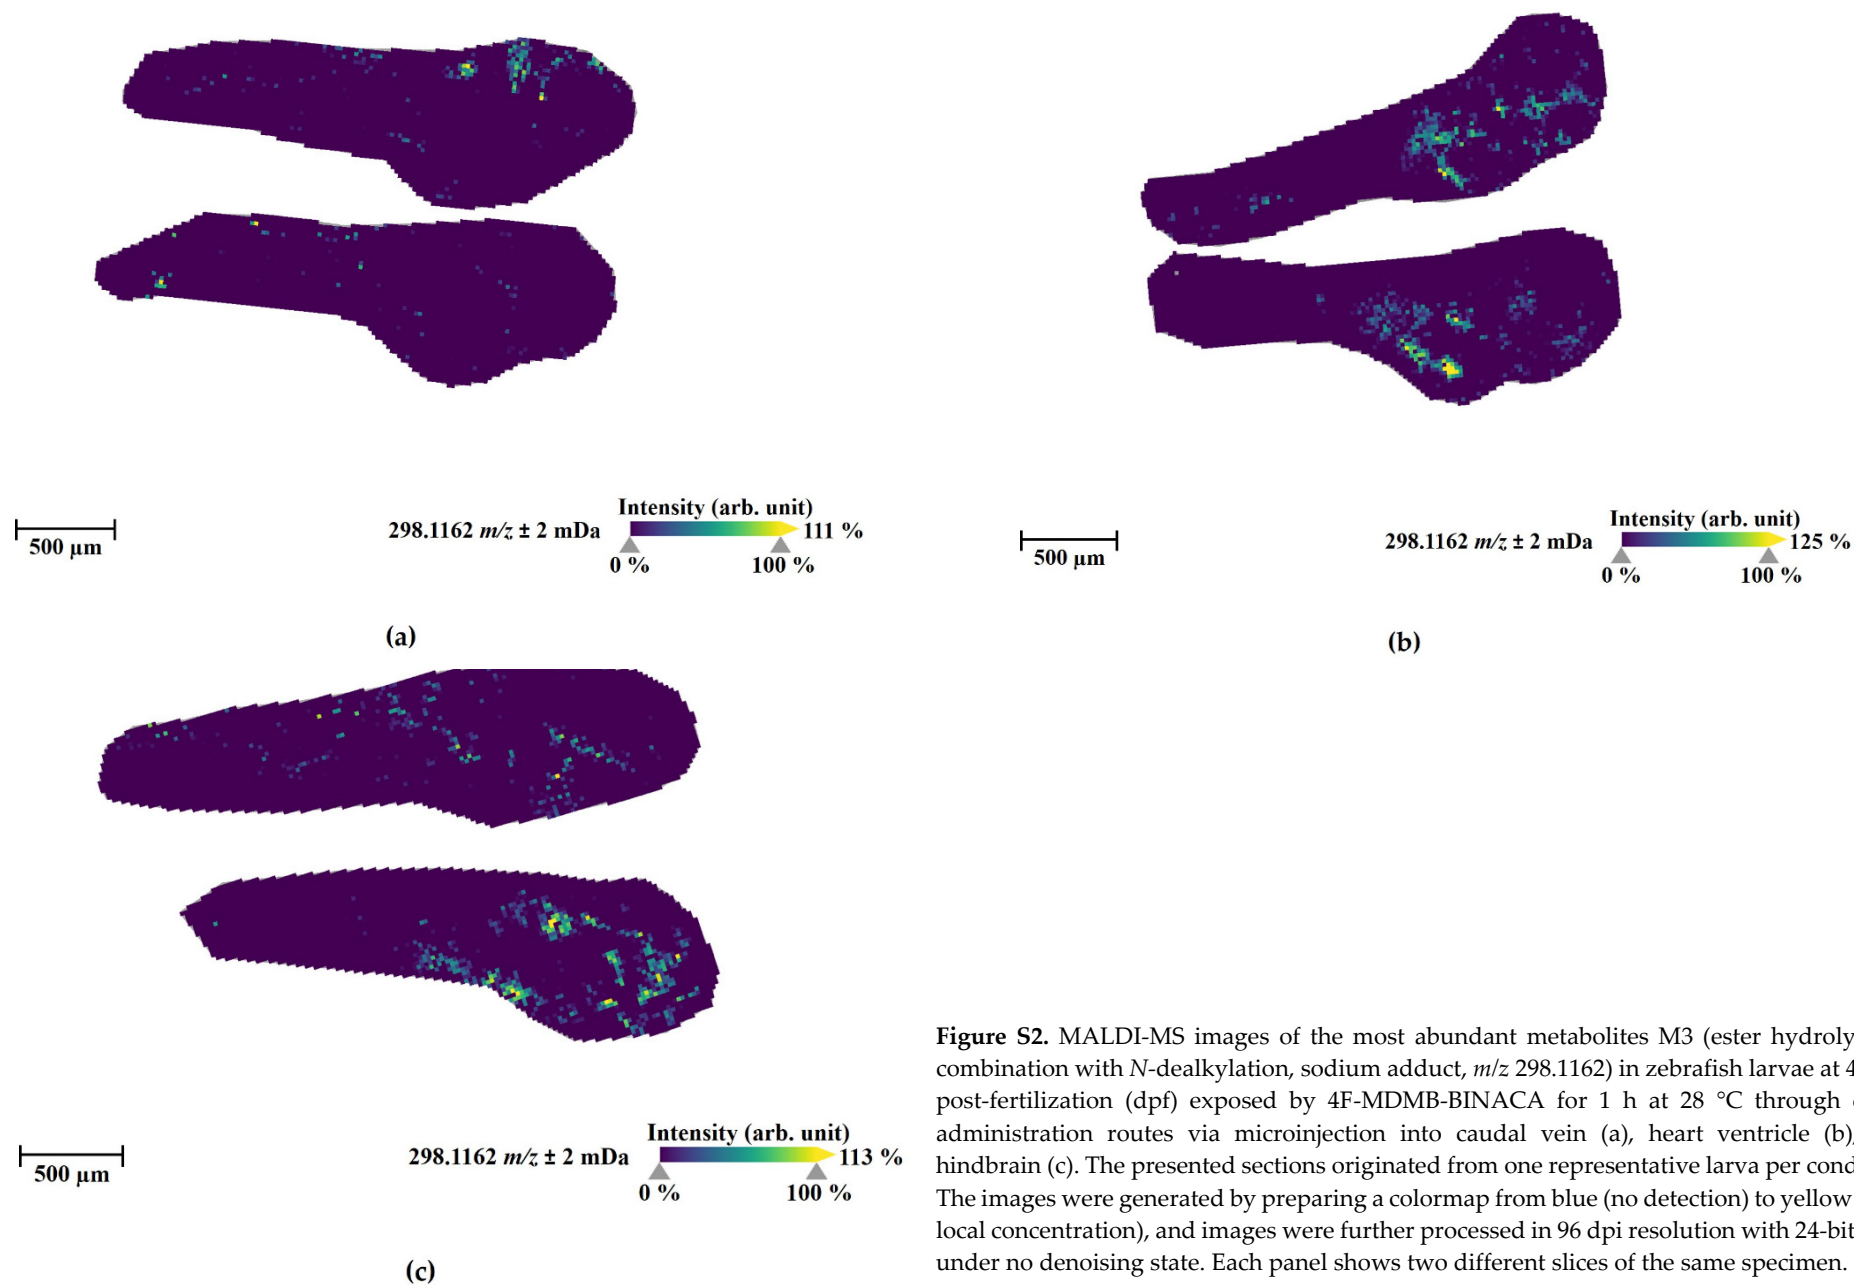

**Figure S2.** MALDI-MS images of the most abundant metabolites M3 (ester hydrolysis in combination with *N*-dealkylation, sodium adduct,  $m/z$  298.1162) in zebrafish larvae at 4 days post-fertilization (dpf) exposed by 4F-MDMB-BINACA for 1 h at 28 °C through direct administration routes via microinjection into caudal vein (a), heart ventricle (b), and hindbrain (c). The presented sections originated from one representative larva per condition. The images were generated by preparing a colormap from blue (no detection) to yellow (high local concentration), and images were further processed in 96 dpi resolution with 24-bit color under no denoising state. Each panel shows two different slices of the same specimen.

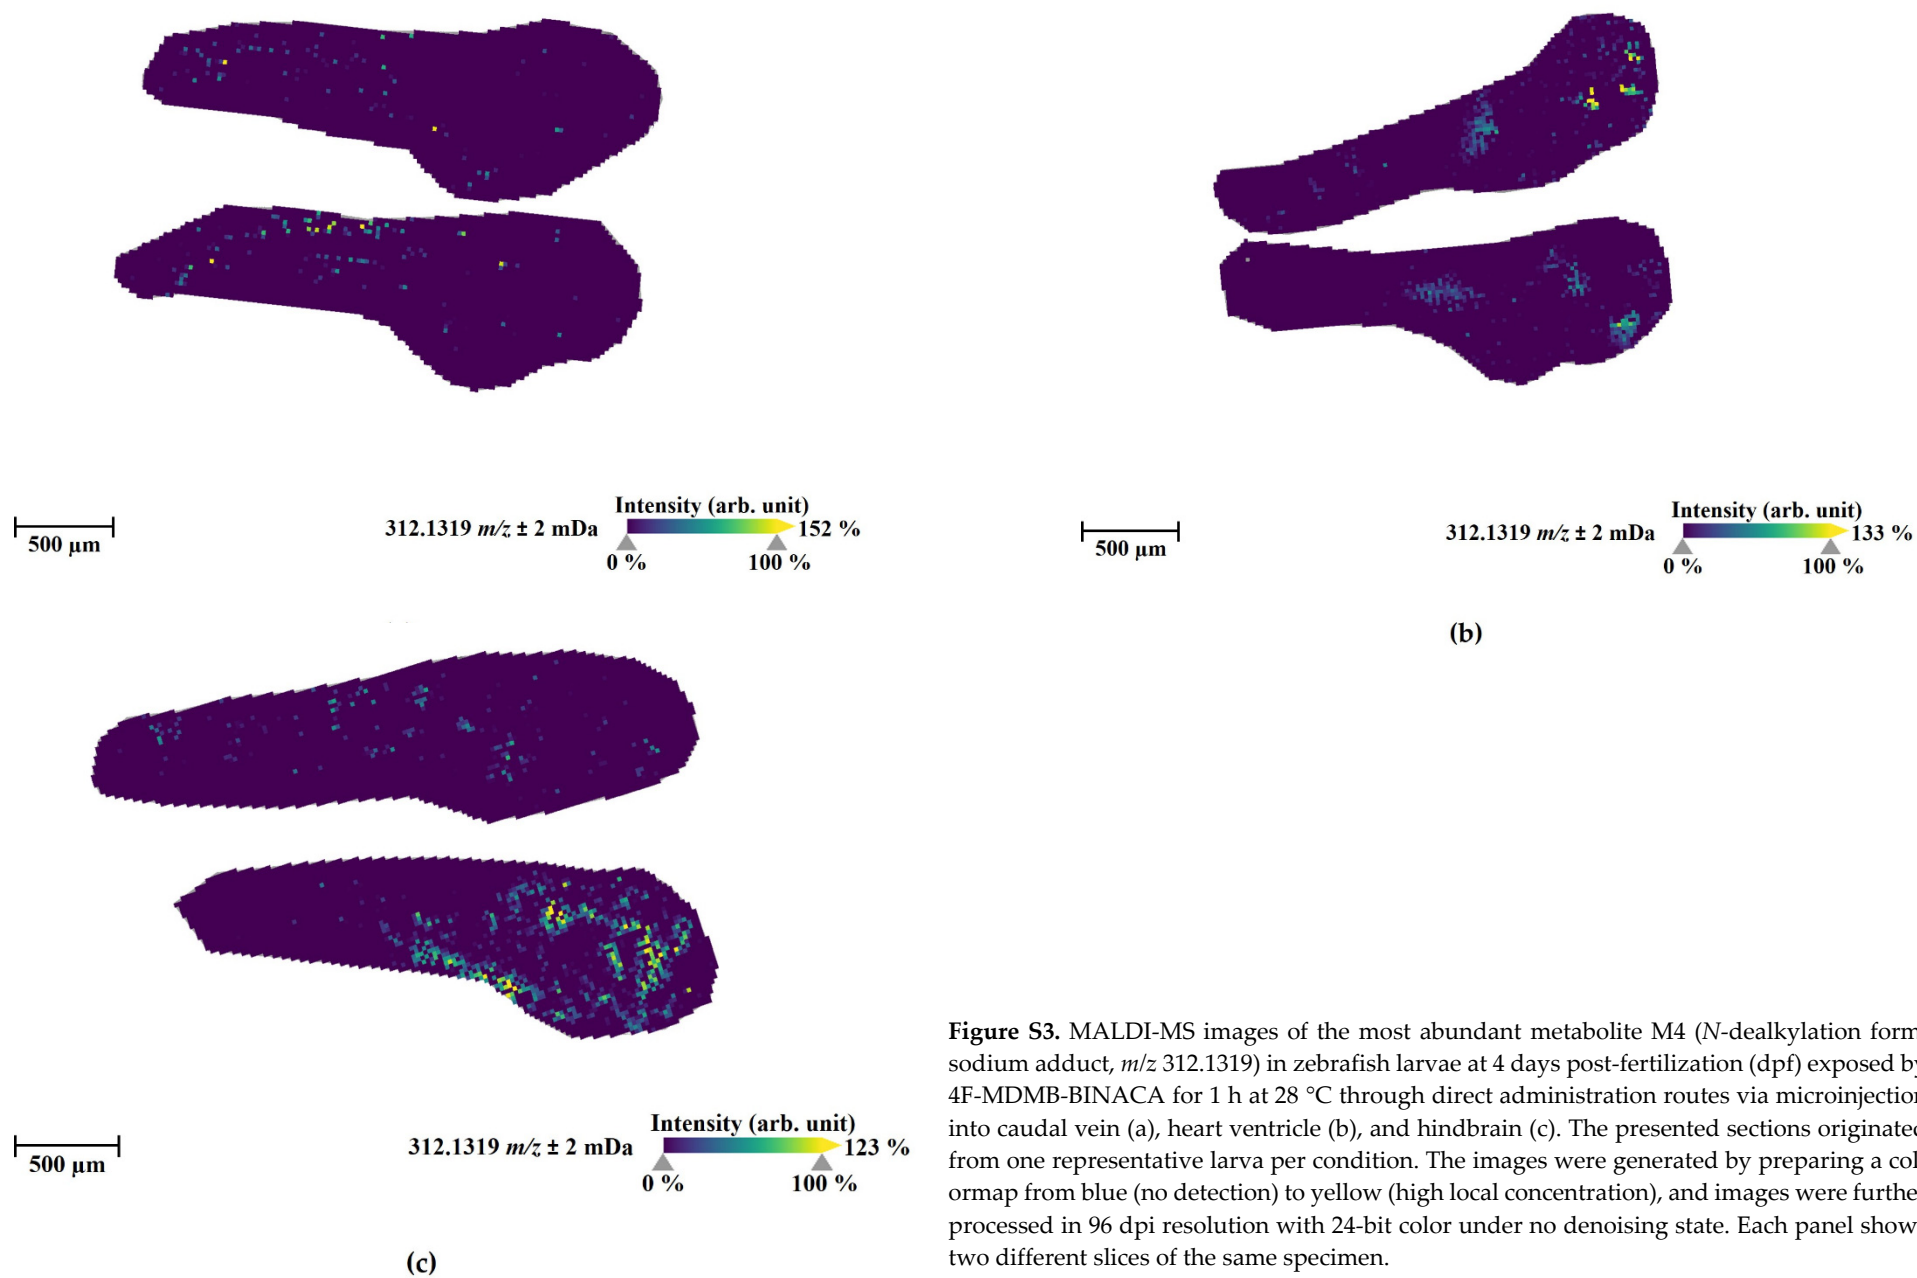

**Figure S3.** MALDI-MS images of the most abundant metabolite M4 (N-dealkylation form, sodium adduct,  $m/z$  312.1319) in zebrafish larvae at 4 days post-fertilization (dpf) exposed by 4F-MDMB-BINACA for 1 h at 28 °C through direct administration routes via microinjection into caudal vein (a), heart ventricle (b), and hindbrain (c). The presented sections originated from one representative larva per condition. The images were generated by preparing a colormap from blue (no detection) to yellow (high local concentration), and images were further processed in 96 dpi resolution with 24-bit color under no denoising state. Each panel shows two different slices of the same specimen.

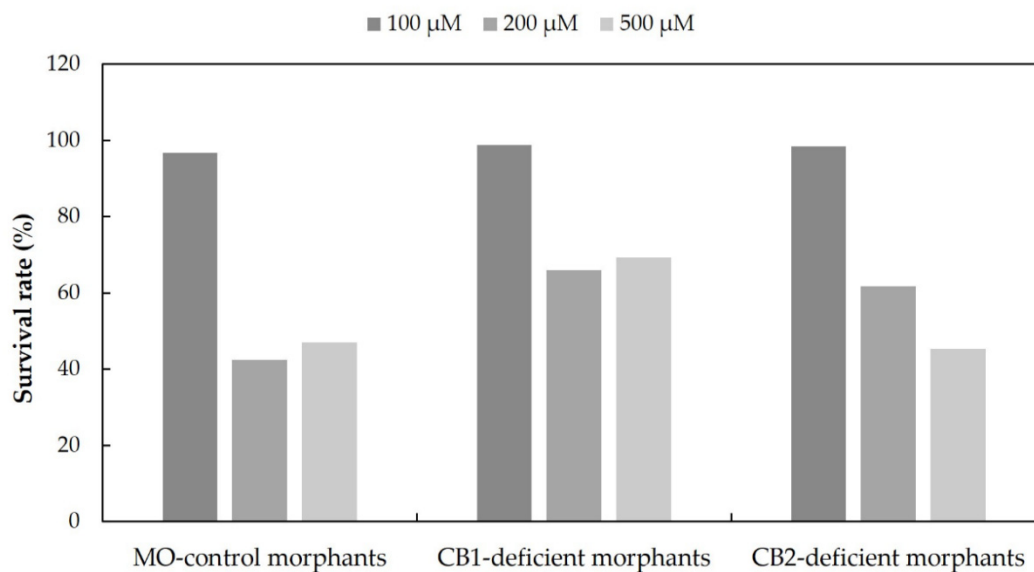

**Figure S4.** The survival rates of zebrafish mutant larvae at 4 days post-fertilization (dpf) according to the different concentrations of each morpholino oligonucleotide (MO) at 100  $\mu$ M, 200  $\mu$ M, and 500  $\mu$ M with the fixed injection volume of 4.19 nL. All mutant larvae were prepared by 4.19 nL injections of MOs at a one-cell stage. Survival rates (%) were calculated based on the total numbers of ZF mutant larvae measured per condition due to the variance of offspring quality and quantity in parent fish. [n = 126-205 (at 100  $\mu$ M), 80-136 (at 200  $\mu$ M), 83-101 (at 500  $\mu$ M)]. The *p*-values between the 100  $\mu$ M group showing 100 % survival and the two other groups (200  $\mu$ M, 500  $\mu$ M) were computed by one-way ANOVA, and all *p*-values showed significance (\**p*<0.05).

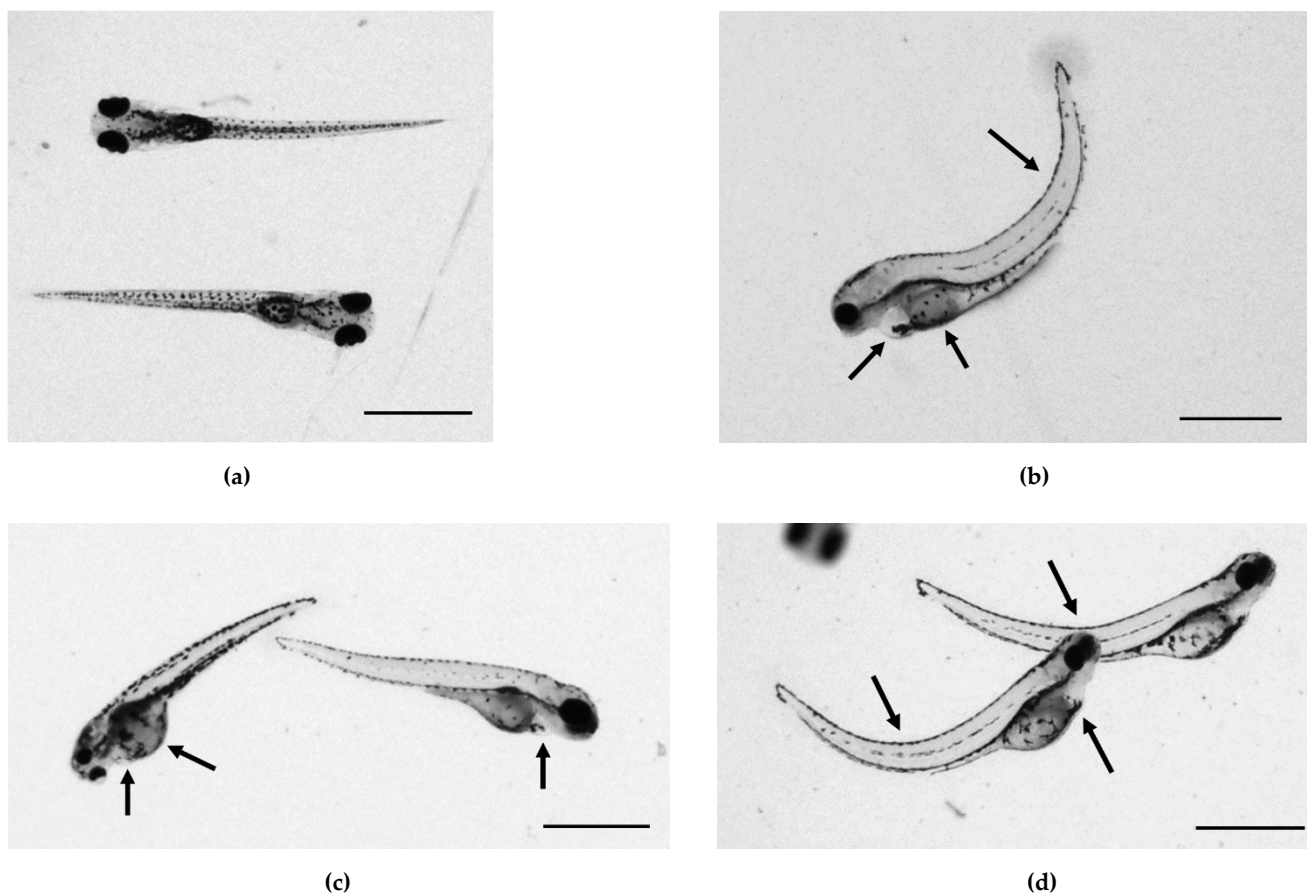

**Figure S5.** Representative images of morphological malformations and signs of toxicity (depicted by black arrows) in zebrafish larvae at 5 days post-fertilization (dpf) as observed in CB knockdown experiments (MO). The control group, which was left untreated (a), did not show any malformation, whereas some ZF larvae injected with the random MO control 25-N (b) displayed edema in the heart ventricle, an up-curved spine, and non-spherical yolk sac. Several CB1 knockdown ZF larvae (c) showed edemas in the heart ventricle and an abnormally large size of the yolk sac. Similarly, several CB2 knockdown ZF larvae (d) showed up-curved spines and heart ventricle edema. The displayed larvae in panel (b)–(d) were created by 4.19 nL injection of each MO (100  $\mu$ M) at a one-cell stage. To study the impact of MO injection on larval development, all ZF larvae were checked daily under a microscope, and deformed morphants were excluded from the experiments for drug metabolisms studies. Scale bars: 1 mm.

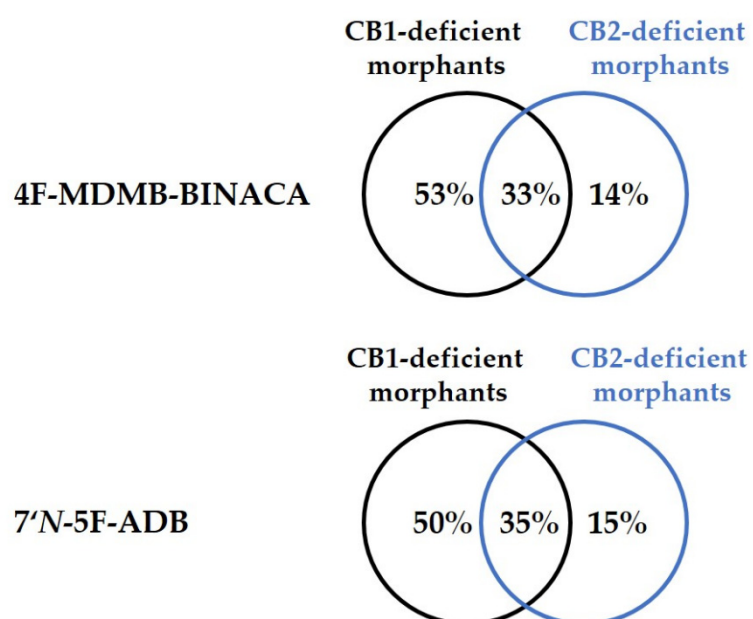

**Figure S6.** Mutual comparability of the overall metabolites detected in CB1-deficient and CB2-deficient ZF larvae after waterborne exposure of 4F-MDMB-BINACA (at 25  $\mu$ M) and 7'N-5F-ADB (at 50  $\mu$ M) using Venn diagrams (n=3).

**Table S1.** Detailed information of 4F-MDMB-BINACA and its phase I and phase II metabolites and their detection in human biosamples from published literature and microinjected zebrafish larvae. All metabolites were identified from three different models in our previous study [27].

| Compound        | Metabolite ID  | Calculated exact masses, m/z | Metabolic reaction                                                          | Integrated Human Screening Data* [27,32,34,35] |                  |                                  |                  |                   |                  |                   | Data from Zebrafish Larvae     |                                       |                |                 |            |
|-----------------|----------------|------------------------------|-----------------------------------------------------------------------------|------------------------------------------------|------------------|----------------------------------|------------------|-------------------|------------------|-------------------|--------------------------------|---------------------------------------|----------------|-----------------|------------|
|                 |                |                              |                                                                             | Plasma [27] (n=1)                              | Blood [32] (n=4) | Integrated Blood [27,32] [27,32] | Urine [27] (n=1) | Urine [35] (n=17) | Urine [32] (n=4) | Urine [34] (n=20) | Integrated Urine [27,32,34,35] | Aquatic Exposure, Published Data [27] | Microinjection |                 |            |
|                 |                |                              |                                                                             |                                                |                  |                                  |                  |                   |                  |                   |                                |                                       | Caudal Vein    | Heart Ventricle | Hind-brain |
|                 |                |                              |                                                                             |                                                |                  |                                  |                  |                   |                  |                   |                                |                                       |                |                 |            |
| Parent compound | 4F-MDMB-BINACA | 364.2031                     | Parent Compound                                                             | +++                                            |                  |                                  | +                |                   |                  |                   | +++                            | +++                                   | +++            | +++             |            |
| Phase I         | M1             | 237.1034                     | Amide Hydrolysis                                                            |                                                |                  |                                  |                  |                   |                  |                   |                                |                                       |                |                 |            |
|                 | M2             | 274.1186                     | Lactone formation + N-dealkylation                                          |                                                |                  |                                  |                  |                   |                  |                   | +                              | +nq                                   |                | +nq             |            |
|                 | M3             | 276.1343                     | Ester hydrolysis + N-dealkylation                                           |                                                |                  |                                  |                  |                   | +                | ++                | √√                             |                                       | +nq            | +nq             | +nq        |
|                 | M4             | 290.1499                     | N-Dealkylation                                                              | +                                              | +                | √√                               |                  |                   |                  |                   |                                | +                                     | +              | +               | +          |
|                 | M5             | 346.1761                     | Lactone formation + oxidative defluorination                                |                                                |                  |                                  |                  |                   |                  |                   |                                | +                                     |                |                 |            |
|                 | M6             | 348.1718                     | Lactone formation                                                           | +                                              | +                | √                                | +                | ++                | +                | +                 | √√                             | ++                                    | +              | +               | +          |
|                 | M7             | 348.1918                     | Ester hydrolysis + oxidative defluorination                                 |                                                |                  |                                  |                  | +                 | +                | +                 | √                              | +                                     |                |                 |            |
|                 | M8             | 350.1874                     | Ester hydrolysis                                                            | ++                                             | ++               | √                                | +                | +++               | +++              | +++               | √                              | +                                     |                |                 |            |
|                 | M9             | 360.1554                     | Lactone formation + oxidative defluorination + oxidation to carboxylic acid |                                                |                  |                                  |                  |                   |                  |                   |                                | +                                     |                |                 |            |
|                 | M10            | 362.1710                     | Ester hydrolysis + oxidative defluorination + oxidation to carboxylic acid  |                                                |                  |                                  |                  | +                 | +                | +                 | √√                             | +                                     | +nq            | +nq             | +nq        |
|                 | M11            | 362.2074                     | Oxidative defluorination                                                    |                                                | +++              |                                  |                  | +                 |                  | +                 | √√                             | +                                     | +              | +               | +          |
|                 | M12            | 364.1667                     | Lactone formation + hydroxylation of the tertiary butyl part                |                                                |                  |                                  |                  |                   |                  |                   |                                | +                                     | +              | +               | ++         |
|                 | M13            | 366.1824                     | Ester hydrolysis + hydroxylation of the tertiary butyl part isomer 1        |                                                |                  |                                  | ++               | +                 | +                |                   | √                              | +                                     |                |                 |            |



|                                                 |                                     |          |                                                                          |   |   |   |     |    |   |    |    |     |    |    |
|-------------------------------------------------|-------------------------------------|----------|--------------------------------------------------------------------------|---|---|---|-----|----|---|----|----|-----|----|----|
|                                                 | M14                                 | 366.1824 | Ester hydrolysis + hydroxylation of the indazole part isomer 2           |   |   |   | +   |    | + | √  |    |     |    |    |
|                                                 | M15                                 | 376.1867 | Oxidative defluorination + oxidation to carboxylic acid                  |   |   |   | +   | ++ | + | √√ | +  | +   | ++ | +  |
|                                                 | M16                                 | 380.1980 | Hydroxylation of the tertiary butyl part isomer 1                        | + |   |   | +   |    |   |    | +  |     |    |    |
|                                                 | M17                                 | 380.1980 | Hydroxylation of the butyl chain isomer 2                                |   |   |   | +   |    |   |    |    |     |    |    |
|                                                 | M18                                 | 380.1980 | Hydroxylation of the indazole part isomer 3                              |   |   |   | +   |    |   |    | +  |     |    |    |
|                                                 | M19                                 | 380.1980 | Hydroxylation of the indazole part isomer 4                              |   |   |   | +   |    |   |    |    |     |    |    |
|                                                 | Total number of Phase I metabolites |          |                                                                          | 4 | 4 | 3 | 3   | 12 | 7 | 8  | 9  | 14  | 8  | 7  |
| Phase II                                        | M20                                 | 460.1548 | Hydroxylation of the indazole part + sulfation                           |   |   |   |     |    |   |    | +  | ++  | +  | +  |
|                                                 | M21                                 | 524.2239 | Ester hydrolysis + oxidative defluorination + glucuronidation            |   |   |   |     |    |   |    |    |     |    |    |
|                                                 | M22                                 | 526.2196 | Ester hydrolysis + glucuronidation                                       |   |   |   | +++ |    |   |    |    |     |    |    |
|                                                 | M23                                 | 542.2144 | Ester hydrolysis + hydroxylation of the indazole part + glucuronidation  |   |   |   |     |    |   |    |    |     |    |    |
|                                                 | M24                                 | 552.2188 | Oxidative defluorination + oxidation to carboxylic acid+ glucuronidation |   |   |   |     |    |   |    | +  |     |    |    |
|                                                 | M25                                 | 556.2301 | Hydroxylation of the tertiary butyl part + glucuronidation isomer 1      |   |   |   |     |    |   |    | +  | +nq | +  | +  |
|                                                 | M26                                 | 556.2301 | Hydroxylation of the indazole part + glucuronidation isomer 2            |   |   |   |     |    |   |    | +  |     |    |    |
| Total number of Phase II metabolites            |                                     |          |                                                                          |   |   | 1 |     |    |   |    | 4  | 2   | 2  | 2  |
| Total number of detected Phase I/II metabolites |                                     |          | 4                                                                        | 4 | 3 | 4 | 12  | 7  | 8 | 9  | 18 | 10  | 9  | 10 |

<sup>1</sup> All human data were integrated with the recently published studies; √: Detection at least twice among the samples in each respective human matrix; √√: detection in both the microinjected ZF larvae and each human biosample; <sup>nq</sup> confirmed mass, but not quantified due to peak detection below signal-to-noise ratio of 3. +: Peak detected, ++: second most abundant peak among metabolites, +++: most abundant peak among metabolites.

**Table S2.** Mass list of 4F-MDMB-BINACA and its phase I and phase II metabolites used for LC-HRMS/MS and MALDI-FT-ICR measurements.

| Compounds            | Metabolite ID  | [M + H] <sup>+</sup> ion<br>for LC-HRMS/MS [27] | [M + Na] <sup>+</sup> ion<br>for MALDI-FT-ICR |
|----------------------|----------------|-------------------------------------------------|-----------------------------------------------|
| Parent compound      | 4F-MDMB-BINACA | 364.2031                                        | 386.1850                                      |
| Phase I metabolites  | M1             | 237.1034                                        | 259.0853                                      |
|                      | M2             | 274.1186                                        | 296.1006                                      |
|                      | M3             | 276.1343                                        | 298.1162                                      |
|                      | M4             | 290.1499                                        | 312.1319                                      |
|                      | M5             | 346.1761                                        | 368.1581                                      |
|                      | M6             | 348.1718                                        | 370.1537                                      |
|                      | M7             | 348.1918                                        | 370.1737                                      |
|                      | M8             | 350.1874                                        | 372.1694                                      |
|                      | M9             | 360.1554                                        | 383.1452                                      |
|                      | M10            | 362.1710                                        | 384.1530                                      |
|                      | M11            | 362.2074                                        | 384.1894                                      |
|                      | M12            | 364.1667                                        | 386.1487                                      |
|                      | M13            | 366.1824                                        | 388.1643                                      |
|                      | M14            | 366.1824                                        | 388.1643                                      |
|                      | M15            | 376.1867                                        | 398.1686                                      |
|                      | M16            | 380.1980                                        | 402.1800                                      |
|                      | M17            | 380.1980                                        | 402.1800                                      |
|                      | M18            | 380.1980                                        | 402.1800                                      |
|                      | M19            | 380.1980                                        | 402.1800                                      |
| Phase II metabolites | M20            | 460.1548                                        | 482.1368                                      |
|                      | M21            | 524.2239                                        | 546.2058                                      |
|                      | M22            | 526.2196                                        | 548.2015                                      |
|                      | M23            | 542.2144                                        | 564.1964                                      |
|                      | M24            | 552.2188                                        | 574.2007                                      |
|                      | M25            | 556.2301                                        | 578.2120                                      |
|                      | M26            | 556.2301                                        | 578.2120                                      |

**Table S3.** Comparison of the total number of metabolites detected in zebrafish larvae and human urine samples for 7'-N-5F-ADB and 4F-MDMB-BINACA.

| Compound         | Total number of metabolites | Human urine samples |                      | Microinjected zebrafish larvae <sup>1</sup> |                      |
|------------------|-----------------------------|---------------------|----------------------|---------------------------------------------|----------------------|
|                  |                             | Phase I metabolites | Phase II metabolites | Phase I metabolites                         | Phase II metabolites |
| 7'-N-5F-ADB [28] | 36                          | 17                  | 10                   | 17 (12) <sup>2</sup>                        | 7 (7) <sup>2</sup>   |
| 4F-MDMB-BINACA   | 26                          | 9 <sup>3</sup>      | 0 <sup>3</sup>       | 8+1 <sup>4</sup> (5) <sup>2</sup>           | 2 (0) <sup>2</sup>   |

<sup>1</sup> Zebrafish larvae were exposed to the parent compound via microinjection at a final concentration of 5 mM. <sup>2</sup> The values in parentheses stand for the number of overlapping metabolites to human urine samples per compound. <sup>3</sup> The human urine data for 4F-MDMB-BINACA was generated based on literature [27,32,34,35]. <sup>4</sup> The 4F-MDMB-BINACA metabolite M1 detected by MALDI-FT-ICR analysis was included in the ZF larvae data.

**Table S4.** Number of morphological malformation cases (given in % of total population observed) in the zebrafish mutant larvae from 3 days post-fertilization (dpf) to 4 dpf after MOs injection at a one-cell stage with three different concentrations.

|                         | at 3 dpf    |             |             | at 4 dpf    |             |             |
|-------------------------|-------------|-------------|-------------|-------------|-------------|-------------|
|                         | 100 $\mu$ M | 200 $\mu$ M | 500 $\mu$ M | 100 $\mu$ M | 200 $\mu$ M | 500 $\mu$ M |
| MO-control morphants    | 11          | 10          | 7           | 11 (11+0)   | 10 (10+0)   | 7 (7+0)     |
| CB1-deficient morphants | 10          | 6           | 14          | 12 (10+2)   | 9 (6+3)     | 17 (14+3)   |
| CB2-deficient morphants | 12          | 15          | 17          | 16 (12+4)   | 15 (15+0)   | 20 (17+3)   |

All MOs were injected with a 4.19 nL volume into one-cell stage zebrafish embryos. The defect rates (%) were calculated based on the total sample number due to the difference in offspring quality and quantity used in the experiments. All values in parentheses are % of malformed larvae at 3 dpf + % of malformed larvae at 4 dpf. [n = 126-205 (at 100  $\mu$ M), n = 80-136 (at 200  $\mu$ M), n = 83-101 (at 500  $\mu$ M)].

**Table S5.** Sequences of morpholino oligonucleotides (MOs) for the gene knockdown of CB1 and CB2 by binding its splicing site.

| Gene                       | Morpholino sequence                    |
|----------------------------|----------------------------------------|
| <i>cnr1</i>                | GTGCTATCAACAACATACCTTTGTG <sup>a</sup> |
| <i>cnr2</i>                | GCCATGAAACAAACAGTACCTGTGG <sup>a</sup> |
| n.a. (random control 25-N) | NNNNNNNNNNNNNNNNNNNNNNNNNNNNNN         |

<sup>a</sup> The sequences of MOs for CB1 and CB2 were validated in earlier studies [38,58].
